# Supplementary material
Source: PubMed Central journal article supplement (PMC3641651)
Supplement: NIHMS415140-supplement-Supplemental_Tablesa.pdf [file NIHMS415140-supplement-Supplemental_Tablesa.pdf]

Supplemental Table 1. List of all quantified proteins from CA-MRSA USA300 and its *codY* mutant during post-exponential phase. Ratio and standard deviation values are Log<sub>2</sub> transformed.

| Sequence ID   | Gene           | Sequence Name                                     | HOU <i>codY</i> Ratio | HOU <i>codY</i> StdDev | Protein Length (AA) | Protein Weight (kDa) | Total Score | Total Peptides (Paris Guidelines) |
|---------------|----------------|---------------------------------------------------|-----------------------|------------------------|---------------------|----------------------|-------------|-----------------------------------|
| SAUSA300_0951 | <i>sspA</i>    | V8 protease                                       | 4.07                  | 2.28                   | 336                 | 36.28559678          | 679.55      | 9                                 |
| SAUSA300_2572 | <i>aur</i>     | Zinc metalloproteinase aureolysin                 | 3.82                  | 2.71                   | 509                 | 56.30886538          | 1516.18     | 24                                |
| SAUSA300_0994 | <i>pdhB</i>    | Pyruvate dehydrogenase E1 component, beta subunit | 3.14                  | 4.49                   | 325                 | 35.20614315          | 196.66      | 4                                 |
| SAUSA300_2441 | <i>fnbA</i>    | Fibronectin-binding protein A                     | 2.99                  | 2                      | 1018                | 111.62417            | 529.51      | 9                                 |
| SAUSA300_1754 | <i>splE</i>    | Serine protease                                   | 2.86                  | 0.46                   | 238                 | 25.64540227          | 301.25      | 6                                 |
| SAUSA300_1382 | <i>lukS-PV</i> | Panton-Valentine leukocidin                       | 2.79                  | 1.73                   | 312                 | 35.27356228          | 986.33      | 17                                |
| SAUSA300_1759 |                | Putative uncharacterized protein                  | 2.76                  | 2.06                   | 188                 | 20.32449146          | 893.13      | 13                                |
| SAUSA300_2366 | <i>hlgC</i>    | Gamma-hemolysin component C                       | 2.75                  | 2.1                    | 315                 | 35.57391794          | 905.79      | 18                                |
| SAUSA300_1757 | <i>splB</i>    | Serine protease                                   | 2.72                  | 2.29                   | 240                 | 26.0625146           | 854.37      | 15                                |
| SAUSA300_1029 | <i>isdA</i>    | Iron-regulated surface determinant protein A      | 2.54                  | 1.66                   | 350                 | 38.70392863          | 180.82      | 5                                 |
| SAUSA300_0995 |                | Dihydrolipoamide acetyltransferase                | 2.53                  | 3.3                    | 430                 | 46.33564073          | 141.45      | 5                                 |
| SAUSA300_1769 | <i>lukE</i>    | Leukotoxin                                        | 2.34                  | 2.18                   | 311                 | 34.77971889          | 471.91      | 8                                 |
| SAUSA300_0815 | <i>ear</i>     | Ear protein                                       | 2.3                   | 2.07                   | 184                 | 20.40659272          | 397.86      | 10                                |
| SAUSA300_1381 | <i>lukF-PV</i> | Panton-Valentine leukocidin                       | 2.29                  | 2                      | 325                 | 36.92138469          | 1070.2      | 19                                |
| SAUSA300_0950 | <i>sspB</i>    | Cysteine protease                                 | 2.15                  | 2.13                   | 393                 | 44.47325267          | 2028.49     | 24                                |
| SAUSA300_0409 |                | Putative uncharacterized protein                  | 1.86                  | 0.58                   | 102                 | 11.27681814          | 265.18      | 6                                 |
| SAUSA300_1768 | <i>lukD</i>    | Leukotoxin                                        | 1.79                  | 1.89                   | 327                 | 36.84833576          | 479.15      | 9                                 |
| SAUSA300_0307 |                | 5'-nucleotidase, lipoprotein e(P4) family         | 1.68                  | 0.74                   | 296                 | 33.31333618          | 571.53      | 11                                |
| SAUSA300_2367 | <i>hlgB</i>    | Gamma-hemolysin component B                       | 1.61                  | 1.91                   | 325                 | 36.67032865          | 897.11      | 19                                |
| SAUSA300_2177 | <i>rplQ</i>    | 50S ribosomal protein L17                         | 1.38                  | 2.8                    | 122                 | 13.72143655          | 206.22      | 3                                 |
| SAUSA300_0776 | <i>nuc</i>     | Thermonuclease                                    | 1.29                  | 2.02                   | 228                 | 25.08599091          | 1457.75     | 24                                |
| SAUSA300_0532 | <i>fusA</i>    | Elongation factor G                               | 1.14                  | 1                      | 693                 | 76.54595394          | 347.75      | 7                                 |
| SAUSA300_1758 | <i>splA</i>    | Serine protease                                   | 1.13                  | 3.01                   | 235                 | 25.51505805          | 104.43      | 2                                 |
| SAUSA300_0224 | <i>coa</i>     | Staphylocoagulase                                 | 1.02                  | 2.1                    | 609                 | 68.72057008          | 1186.83     | 23                                |
| SAUSA300_1890 | <i>scpA</i>    | Staphopain A                                      | 0.98                  | 1.66                   | 388                 | 44.21658258          | 883.26      | 18                                |

|                 |              |                                                   |       |      |      |             |         |    |
|-----------------|--------------|---------------------------------------------------|-------|------|------|-------------|---------|----|
| SAUSA300_2205   | <i>rpsJ</i>  | 30S ribosomal protein S10                         | 0.96  | 0.27 | 102  | 11.5513354  | 44.16   | 1  |
| SAUSA300_1920   | <i>chp</i>   | Chemotaxis inhibitory protein                     | 0.88  | 0.72 | 149  | 17.02886361 | 430.97  | 9  |
| SAUSA300_1131   | <i>rpsP</i>  | 30S ribosomal protein S16                         | 0.83  | 2.66 | 91   | 10.21053261 | 163.92  | 3  |
| SAUSA300_1058   | <i>hla</i>   | Alpha-hemolysin                                   | 0.64  | 1.31 | 319  | 35.93296263 | 2268.47 | 25 |
| SAUSA300_0693   |              | Putative lipoprotein                              | 0.61  | 0.76 | 146  | 16.01716909 | 504.65  | 10 |
| SAUSA300_1982   | <i>groL</i>  | 60 kDa chaperonin                                 | 0.54  | 0.59 | 538  | 57.57658448 | 70.77   | 2  |
| SAUSA300_2540   | <i>fda</i>   | Fructose-bisphosphate aldolase class 1            | 0.52  | 1.07 | 296  | 33.01607025 | 99.78   | 3  |
| SAUSA300_0703   | <i>ltaS</i>  | Glycerol phosphate lipoteichoic acid synthase     | 0.48  | 1.7  | 646  | 74.33499216 | 1472.8  | 22 |
| SAUSA300_1753   | <i>spIF</i>  | Serine protease                                   | 0.48  | 2.53 | 239  | 25.60720671 | 423.61  | 10 |
| SAUSA300_0270   | <i>lytM</i>  | Peptidoglycan hydrolase                           | 0.45  | 1.26 | 316  | 34.27741142 | 202.21  | 3  |
| SAUSA300_0760   | <i>eno</i>   | Enolase                                           | 0.41  | 3.04 | 434  | 47.06977776 | 293.32  | 6  |
| SAUSA300_0370   |              | Putative staphylococcal enterotoxin               | 0.4   | 2.1  | 203  | 23.13325377 | 247.92  | 7  |
| SAUSA300_2506   | <i>isaA</i>  | Probable transglycosylase                         | 0.24  | 2.11 | 233  | 24.17043842 | 354.35  | 5  |
| SAUSA300_0279   |              | Putative membrane protein                         | 0.22  | 2.14 | 1009 | 114.7358152 | 172.07  | 5  |
| SAUSA300_1755   | <i>spID</i>  | Serine protease                                   | 0.18  | 2.58 | 239  | 25.64424825 | 455.87  | 11 |
| SAUSA300_0320   |              | Triacylglycerol lipase                            | 0.14  | 1.97 | 690  | 76.35304634 | 2672.48 | 47 |
| SAUSA300_2365   | <i>hlgA</i>  | Gamma-hemolysin component A                       | 0.11  | 1.75 | 309  | 34.91611993 | 1076.39 | 15 |
| SAUSA300_1790   | <i>prsA</i>  | Foldase protein                                   | 0.08  | 2.34 | 320  | 35.59773713 | 282.13  | 8  |
| SAUSA300_0756   | <i>gap</i>   | Glyceraldehyde-3-phosphate dehydrogenase, type I  | 0.06  | 3.07 | 336  | 36.24035133 | 322.92  | 7  |
| SAUSA300_2186   | <i>rpmD</i>  | 50S ribosomal protein L30                         | 0.01  | 1.97 | 59   | 6.53168062  | 176.36  | 3  |
| SAUSA300_0424.1 | <i>psmA4</i> | Phenol-soluble modulins alpha 4 peptide           | 0     | 2.32 | 20   | 2.15234226  | 127.16  | 2  |
| SAUSA300_0009   | <i>serS</i>  | Seryl-tRNA synthetase                             | 0     | 3.61 | 428  | 48.59141695 | 86.19   | 2  |
| SAUSA300_1922   | <i>sak</i>   | Staphylokinase                                    | -0.02 | 0.95 | 163  | 18.44470116 | 251.02  | 5  |
| SAUSA300_1053   | <i>flr</i>   | FPRL1 inhibitory protein                          | -0.05 | 0.75 | 133  | 15.17510542 | 299.26  | 8  |
| SAUSA300_2193   | <i>rplX</i>  | 50S ribosomal protein L24                         | -0.09 | 0.63 | 105  | 11.51136164 | 95.42   | 1  |
| SAUSA300_0883   |              | Putative surface protein                          | -0.11 | 0.7  | 144  | 15.81034481 | 1062.63 | 13 |
| SAUSA300_2183   | <i>adk</i>   | Adenylate kinase                                  | -0.14 | 0.77 | 215  | 23.94124835 | 274.33  | 5  |
| SAUSA300_1459   | <i>gnd</i>   | 6-phosphogluconate dehydrogenase, decarboxylating | -0.18 | 0.85 | 468  | 51.75206505 | 221.59  | 3  |
| SAUSA300_2199   | <i>rplV</i>  | 50S ribosomal protein L22                         | -0.21 | 3.62 | 117  | 12.80899267 | 121.95  | 2  |
| SAUSA300_0424.3 | <i>psmA2</i> | Phenol-soluble modulins alpha 2 peptide           | -0.22 | 3.16 | 21   | 2.25835898  | 188.15  | 2  |

|                     |              |                                                   |       |      |      |             |         |    |
|---------------------|--------------|---------------------------------------------------|-------|------|------|-------------|---------|----|
| SAUSA300_1055       | <i>efb</i>   | Fibrinogen-binding protein                        | -0.23 | 1.99 | 165  | 18.7350233  | 489.9   | 11 |
| SAUSA300_0388       | <i>guaB</i>  | Inosine-5'-monophosphate dehydrogenase            | -0.26 | 0.41 | 21   | 2.24033315  | 267.05  | 3  |
| SAUSA300_0424.4     | <i>psmA1</i> | Phenol-soluble modulin alpha 1 peptide            | -0.26 | 3.13 | 488  | 52.79952975 | 250.57  | 7  |
| SAUSA300_1974       |              | Uncharacterized leukocidin-like protein 1         | -0.35 | 1.63 | 338  | 38.64415667 | 1511.43 | 27 |
| SAUSA300_2142       | <i>asp23</i> | Alkaline shock protein 23                         | -0.37 | 1.26 | 169  | 19.16166637 | 99.18   | 2  |
| SAUSA300_1540       | <i>dnaK</i>  | Chaperone protein                                 | -0.53 | 1.2  | 610  | 66.30297262 | 217.22  | 6  |
| SAUSA300_0964       |              | Chitinase-related protein                         | -0.6  | 1.56 | 105  | 11.31991499 | 202.86  | 4  |
| SAUSA300_pUSA010004 |              | Putative uncharacterized protein                  | -0.62 | 1.22 | 1256 | 137.3211137 | 2335.54 | 43 |
| SAUSA300_0955       | <i>atl</i>   | Autolysin                                         | -0.62 | 1.23 | 193  | 21.23938356 | 929.54  | 19 |
| SAUSA300_2579       |              | N-acetylmuramoyl-L-alanine amidase domain protein | -0.64 | 1.71 | 619  | 69.16364842 | 1669.45 | 24 |
| SAUSA300_1975       |              | Uncharacterized leukocidin-like protein 2         | -0.65 | 1.99 | 351  | 40.39162688 | 1296.57 | 22 |
| SAUSA300_2253       | <i>ssaA</i>  | Secretory antigen                                 | -0.66 | 0.9  | 166  | 17.37014404 | 293.46  | 2  |
| SAUSA300_2079       | <i>fba</i>   | Fructose bisphosphate aldolase                    | -0.71 | 1.22 | 286  | 30.79867417 | 292.65  | 6  |
| SAUSA300_1756       | <i>spIC</i>  | Serine protease                                   | -0.74 | 1.86 | 239  | 26.0643809  | 619.7   | 11 |
| SAUSA300_1052       |              | Fibrinogen-binding protein                        | -0.74 | 2    | 109  | 12.57092498 | 99.42   | 3  |
| SAUSA300_0862       | <i>glpQ</i>  | Glycerophosphoryl diester phosphodiesterase       | -0.84 | 0.25 | 309  | 35.27086048 | 635.89  | 12 |
| SAUSA300_2179       | <i>rpsK</i>  | 30S ribosomal protein S11                         | -0.84 | 1.72 | 129  | 13.85536771 | 55.32   | 1  |
| SAUSA300_2164       |              | Putative uncharacterized protein                  | -0.95 | 1.32 | 141  | 15.42004573 | 920.05  | 14 |
| SAUSA300_1919       | <i>scn</i>   | Staphylococcal complement inhibitor               | -1.03 | 1.69 | 116  | 13.04092866 | 562.7   | 5  |
| SAUSA300_1148       | <i>codY</i>  | GTP-sensing transcriptional pleiotropic repressor | -1.08 | 1.22 | 257  | 28.71934881 | 106.8   | 3  |
| SAUSA300_2603       | <i>lip</i>   | Triacylglycerol lipase                            | -1.15 | 2.12 | 680  | 76.61122401 | 3136.14 | 55 |
| SAUSA300_2364       | <i>sbi</i>   | Immunoglobulin-binding protein                    | -1.21 | 1.74 | 436  | 50.02191666 | 1259.79 | 27 |
| SAUSA300_0602       |              | Putative uncharacterized protein                  | -1.41 | 1.03 | 168  | 18.56444985 | 660.87  | 12 |
| SAUSA300_0618       |              | ABC transporter, substrate-binding protein        | -1.43 | 1.43 | 309  | 34.70096946 | 595.4   | 8  |
| SAUSA300_0380       | <i>ahpC</i>  | Alkyl hydroperoxide reductase subunit C           | -1.44 | 1.7  | 189  | 20.94547817 | 381.63  | 8  |
| SAUSA300_2192       | <i>rplE</i>  | 50S ribosomal protein L5                          | -1.56 | 1.73 | 394  | 43.05859328 | 656.35  | 11 |
| SAUSA300_0533       | <i>tuf</i>   | Elongation factor Tu                              | -1.56 | 1.85 | 179  | 20.235725   | 203.93  | 4  |
| SAUSA300_1603       | <i>rplU</i>  | 50S ribosomal protein L21                         | -1.56 | 1.92 | 102  | 11.30811489 | 131.14  | 3  |
| SAUSA300_0651       |              | CHAP domain family                                | -1.67 | 1.03 | 265  | 28.1514224  | 535.9   | 6  |
| SAUSA300_1201       | <i>glnA</i>  | Glutamine synthetase                              | -1.73 | 0.62 | 190  | 21.27478326 | 429.97  | 10 |

|               |             |                                  |       |      |     |             |         |    |
|---------------|-------------|----------------------------------|-------|------|-----|-------------|---------|----|
| SAUSA300_0372 |             | Putative lipoprotein             | -1.73 | 1.11 | 446 | 50.79039514 | 381.29  | 5  |
| SAUSA300_0032 | <i>mecA</i> | Penicillin-binding protein 2'    | -1.79 | 1.84 | 668 | 76.03711644 | 1663.74 | 30 |
| SAUSA300_0278 |             | Putative uncharacterized protein | -2.02 | 1.26 | 97  | 11.01143135 | 384.5   | 8  |
| SAUSA300_1362 | <i>hup</i>  | DNA-binding protein HU           | -2.03 | 0.99 | 90  | 9.60215929  | 476.05  | 7  |
| SAUSA300_1067 |             | Antibacterial protein            | -2.23 | 1.02 | 44  | 4.47537766  | 557.22  | 6  |
| SAUSA300_1988 |             | Delta-hemolysin                  | -2.31 | 1.48 | 44  | 4.98780869  | 57.56   | 1  |
| SAUSA300_2172 | <i>rplM</i> | 50S ribosomal protein L13        | -2.5  | 0.76 | 145 | 16.30536457 | 68.33   | 1  |
| SAUSA300_1232 | <i>katA</i> | Catalase                         | -2.99 | 1.03 | 505 | 58.32519844 | 93.1    | 2  |

Key:

|                                                              |
|--------------------------------------------------------------|
| Downregulated, $\geq 2$ standard deviations away from median |
| Downregulated, $\geq 1$ standard deviation away from median  |
| Upregulated, $\geq 2$ standard deviations away from median   |
| Upregulated, $\geq 1$ standard deviation away from median    |

Supplemental Table 2. List of all quantified proteins from CA-MRSA USA300 and its *codY* mutant during stationary phase. Ratio and standard deviation values are Log<sub>2</sub> transformed.

| Sequence ID   | Gene           | Sequence Name                               | HOU <i>codY</i> Ratio | HOU <i>codY</i> StdDev | Protein Length (AA) | Protein Weight (kDa) | Total Score | Total Peptides (Paris Guidelines) |
|---------------|----------------|---------------------------------------------|-----------------------|------------------------|---------------------|----------------------|-------------|-----------------------------------|
| SAUSA300_2546 | <i>betB</i>    | Glycine betaine aldehyde dehydrogenase      | 5.095                 | 0.33                   | 496                 | 54.57068             | 60.9        | 1                                 |
| SAUSA300_1758 | <i>splA</i>    | Serine protease                             | 4.055                 | 0.96                   | 235                 | 25.51506             | 720.26      | 13                                |
| SAUSA300_2572 | <i>aur</i>     | Zinc metalloproteinase aureolysin           | 3.775                 | 2                      | 509                 | 56.30887             | 1371.7<br>2 | 19                                |
| SAUSA300_1754 | <i>splE</i>    | Serine protease                             | 3.705                 | 2.03                   | 238                 | 25.6454              | 683.03      | 12                                |
| SAUSA300_1653 |                | UPF0173 metal-dependent hydrolase           | 3.635                 | 0.59                   | 229                 | 25.21646             | 153.32      | 3                                 |
| SAUSA300_2366 | <i>hlgC</i>    | Gamma-hemolysin component C                 | 3.535                 | 2.24                   | 315                 | 35.57392             | 1195.6<br>2 | 19                                |
| SAUSA300_1382 | <i>lukS-PV</i> | Panton-Valentine leukocidin                 | 3.495                 | 1.94                   | 312                 | 35.27356             | 1943.6<br>5 | 23                                |
| SAUSA300_0099 | <i>plc</i>     | 1-phosphatidylinositol phosphodiesterase    | 3.415                 | 1.36                   | 328                 | 37.04536             | 544.68      | 11                                |
| SAUSA300_1792 |                | Putative uncharacterized protein            | 3.375                 | 4.49                   | 978                 | 114.3325             | 189.64      | 5                                 |
| SAUSA300_1442 | <i>srrA</i>    | Staphylococcal respiratory response protein | 3.315                 | 1.36                   | 241                 | 28.12537             | 237.18      | 5                                 |
| SAUSA300_0274 |                | Putative uncharacterized protein            | 3.205                 | 1.92                   | 507                 | 57.86896             | 187.57      | 4                                 |
| SAUSA300_1753 | <i>splF</i>    | Serine protease                             | 3.115                 | 1.46                   | 239                 | 25.64425             | 692.97      | 14                                |
| SAUSA300_1755 | <i>splD</i>    | Serine protease                             | 3.115                 | 1.8                    | 239                 | 25.60721             | 639.16      | 13                                |
| SAUSA300_1757 | <i>splB</i>    | Serine protease                             | 3.085                 | 2.01                   | 240                 | 26.06251             | 1555.0<br>1 | 22                                |
| SAUSA300_1458 |                | Glyoxalase family protein                   | 3.065                 | 2.01                   | 123                 | 13.8638              | 170.86      | 2                                 |
| SAUSA300_1381 | <i>lukF-PV</i> | Panton-Valentine leukocidin                 | 3.035                 | 1.61                   | 325                 | 36.92138             | 1985.5<br>8 | 25                                |
| SAUSA300_0815 | <i>ear</i>     | Ear protein                                 | 3.035                 | 2.21                   | 184                 | 20.40659             | 735.92      | 15                                |
| SAUSA300_0951 | <i>sspA</i>    | V8 protease                                 | 2.865                 | 2.51                   | 336                 | 36.2856              | 1055.7<br>5 | 11                                |
| SAUSA300_1801 | <i>fumC</i>    | Fumarate hydratase, class II                | 2.765                 | 3.06                   | 83                  | 9.382639             | 154.87      | 3                                 |
| SAUSA300_1323 |                | Putative uncharacterized protein            | 2.765                 | 3.38                   | 461                 | 51.05748             | 96.85       | 3                                 |
| SAUSA300_1863 |                | Putative uncharacterized protein            | 2.605                 | 3.3                    | 91                  | 10.29763             | 101.04      | 3                                 |
| SAUSA300_1769 | <i>lukE</i>    | Leukotoxin                                  | 2.585                 | 2.22                   | 311                 | 34.77972             | 523.71      | 11                                |
| SAUSA300_2189 | <i>rplF</i>    | 50S ribosomal protein L6                    | 2.565                 | 2.52                   | 178                 | 19.7564              | 195.98      | 4                                 |

|               |             |                                                                       |       |      |     |          |                     |    |
|---------------|-------------|-----------------------------------------------------------------------|-------|------|-----|----------|---------------------|----|
| SAUSA300_1759 |             | Putative uncharacterized protein                                      | 2.545 | 2.28 | 188 | 20.32449 | 1412.4 <sub>9</sub> | 16 |
| SAUSA300_0373 |             | Putative uncharacterized protein                                      | 2.505 | 0.6  | 87  | 10.76419 | 191.06              | 4  |
| SAUSA300_1341 | <i>pbp2</i> | Penicillin binding protein 2                                          | 2.485 | 2.89 | 727 | 80.35886 | 328.46              | 8  |
| SAUSA300_2201 | <i>rplB</i> | 50S ribosomal protein L2                                              | 2.465 | 2.26 | 277 | 30.11849 | 366.19              | 7  |
| SAUSA300_1756 | <i>spcC</i> | Serine protease                                                       | 2.435 | 1.25 | 239 | 26.06438 | 394.97              | 7  |
| SAUSA300_2365 | <i>hlgA</i> | Gamma-hemolysin component A                                           | 2.375 | 2.42 | 309 | 34.91612 | 984.8               | 15 |
| SAUSA300_0950 | <i>sspB</i> | Cysteine protease                                                     | 2.335 | 2.11 | 393 | 44.47325 | 1895.5 <sub>5</sub> | 24 |
| SAUSA300_0891 | <i>oppA</i> | Oligopeptide ABC transporter, substrate-binding protein               | 2.315 | 1.11 | 551 | 61.51598 | 187.97              | 5  |
| SAUSA300_1134 | <i>rplS</i> | 50S ribosomal protein L19                                             | 2.305 | 2.97 | 116 | 13.33557 | 133.52              | 4  |
| SAUSA300_0437 |             | NLPA lipoprotein                                                      | 2.275 | 2.17 | 280 | 30.41945 | 443.04              | 9  |
| SAUSA300_1058 | <i>hla</i>  | Alpha-hemolysin                                                       | 2.245 | 1.47 | 319 | 35.93296 | 3233.6 <sub>1</sub> | 36 |
| SAUSA300_2205 | <i>rpsJ</i> | 30S ribosomal protein S10                                             | 2.205 | 2.5  | 102 | 11.55134 | 82.04               | 2  |
| SAUSA300_2226 | <i>moaB</i> | Molybdenum cofactor biosynthesis protein B                            | 2.105 | 3.98 | 168 | 18.45686 | 132.19              | 2  |
| SAUSA300_0883 |             | Putative surface protein                                              | 2.095 | 1.93 | 144 | 15.81034 | 395.6               | 8  |
| SAUSA300_2097 |             | Putative uncharacterized protein                                      | 2.015 | 2.12 | 375 | 42.0653  | 381.13              | 8  |
| SAUSA300_0859 |             | NADH-dependent flavin oxidoreductase                                  | 2.015 | 3.49 | 221 | 23.99912 | 365.46              | 8  |
| SAUSA300_1299 |             | TelA-like protein                                                     | 2.005 | 3.7  | 378 | 43.3625  | 195.26              | 5  |
| SAUSA300_1512 | <i>pbp3</i> | Penicillin-binding protein 3                                          | 1.985 | 2.06 | 691 | 77.18504 | 363.41              | 8  |
| SAUSA300_0329 |             | Putative oxidoreductase                                               | 1.895 | 5    | 341 | 37.7065  | 84.43               | 2  |
| SAUSA300_1890 | <i>scpA</i> | Staphopain A                                                          | 1.765 | 1.75 | 388 | 44.21658 | 563.46              | 12 |
| SAUSA300_1861 |             | UPF0435 protein                                                       | 1.745 | 1.65 | 68  | 7.765936 | 190.92              | 3  |
| SAUSA300_0598 |             | Putative iron compound ABC transporter, iron compound-binding protein | 1.735 | 0.9  | 275 | 31.05128 | 91.12               | 3  |
| SAUSA300_1251 | <i>parC</i> | DNA topoisomerase IV, subunit A                                       | 1.715 | 1.78 | 486 | 53.17216 | 337.77              | 7  |
| SAUSA300_1370 | <i>ebpS</i> | Elastin-binding protein                                               | 1.715 | 2.43 | 800 | 90.99971 | 118.58              | 4  |
| SAUSA300_1669 |             | Aminotransferase, class V                                             | 1.675 | 1.49 | 386 | 42.80533 | 565.17              | 6  |
| SAUSA300_1574 |             | UPF0297 protein                                                       | 1.665 | 2.27 | 86  | 10.27907 | 264.86              | 5  |
| SAUSA300_2062 | <i>atpF</i> | ATP synthase subunit b                                                | 1.635 | 2.69 | 173 | 19.50933 | 396.49              | 7  |
| SAUSA300_1122 | <i>plsX</i> | Phosphate acyltransferase                                             | 1.615 | 5.16 | 328 | 35.39025 | 72.66               | 3  |
| SAUSA300_0721 |             | Transferrin receptor                                                  | 1.595 | 2.97 | 342 | 37.8128  | 159.21              | 3  |

|               |                         |                                                                       |       |      |      |          |         |    |
|---------------|-------------------------|-----------------------------------------------------------------------|-------|------|------|----------|---------|----|
| SAUSA300_2164 |                         | Putative uncharacterized protein                                      | 1.575 | 1.25 | 141  | 15.42005 | 519.11  | 9  |
| SAUSA300_1615 | <i>hemB</i>             | Delta-aminolevulinic acid dehydratase                                 | 1.575 | 2.67 | 324  | 36.54114 | 116.44  | 3  |
| SAUSA300_1056 |                         | Putative uncharacterized protein                                      | 1.545 | 0.47 | 116  | 13.08795 | 215.26  | 5  |
| SAUSA300_1052 |                         | Fibrinogen-binding protein                                            | 1.535 | 2.53 | 109  | 12.57092 | 167.54  | 4  |
| SAUSA300_0833 | <i>nagD</i>             | Protein nagD homolog                                                  | 1.505 | 3.02 | 259  | 27.91016 | 223.22  | 4  |
| SAUSA300_0531 | <i>rpsG</i>             | 30S ribosomal protein S7                                              | 1.485 | 2.27 | 156  | 17.76544 | 493.8   | 10 |
| SAUSA300_1768 | <i>lukD</i>             | Leukotoxin                                                            | 1.435 | 2.13 | 327  | 36.84834 | 842.85  | 11 |
| SAUSA300_0955 | <i>atl</i>              | Autolysin                                                             | 1.375 | 2.36 | 1256 | 137.3211 | 3529.07 | 65 |
| SAUSA300_1014 | <i>pyc</i>              | Pyruvate carboxylase                                                  | 1.365 | 2.41 | 1150 | 128.4485 | 1425.37 | 27 |
| SAUSA300_1180 |                         | Putative uncharacterized protein                                      | 1.345 | 0.46 | 71   | 8.138163 | 69.89   | 2  |
| SAUSA300_1316 | <i>msrB</i>             | Peptide methionine sulfoxide reductase                                | 1.325 | 2.83 | 142  | 16.24886 | 222.87  | 6  |
| SAUSA300_0357 | <i>metE</i>             | 5-methyltetrahydropteroyltryglutamate--homocysteine methyltransferase | 1.285 | 1.31 | 742  | 85.00517 | 702.89  | 13 |
| SAUSA300_0774 | <i>emp</i>              | Extracellular matrix protein-binding protein                          | 1.285 | 2.6  | 340  | 38.443   | 624.9   | 15 |
| SAUSA300_1988 |                         | Delta-hemolysin                                                       | 1.275 | 1.89 | 502  | 56.49419 | 142.61  | 5  |
| SAUSA300_2542 |                         | Putative AMP-binding enzyme                                           | 1.275 | 1.9  | 44   | 4.987809 | 133.54  | 2  |
| SAUSA300_0408 |                         | Putative surface protein                                              | 1.275 | 2.03 | 532  | 59.69325 | 104.46  | 3  |
| SAUSA300_1682 | <i>ccpA</i>             | Catabolite control protein A                                          | 1.245 | 2.49 | 329  | 36.01967 | 452.78  | 9  |
| SAUSA300_1258 |                         | 4-oxalocrotonate tautomerase                                          | 1.225 | 3.49 | 61   | 6.721508 | 350.81  | 6  |
| SAUSA300_0551 | <i>folE2</i>            | GTP cyclohydrolase                                                    | 1.215 | 1.4  | 292  | 33.44279 | 103.94  | 3  |
| SAUSA300_2400 |                         | Glutaryl-aminopeptidase                                               | 1.205 | 2.62 | 358  | 39.14974 | 248.31  | 5  |
| SAUSA300_1788 |                         | Putative uncharacterized protein                                      | 1.185 | 1.19 | 94   | 10.29049 | 241.77  | 6  |
| SAUSA300_1601 | <i>rpmA</i>             | 50S ribosomal protein L27                                             | 1.185 | 3.44 | 121  | 13.1858  | 126.89  | 3  |
| SAUSA300_0489 | <i>ftsH</i>             | Putative cell division protein                                        | 1.175 | 4.51 | 697  | 77.718   | 124.7   | 3  |
| SAUSA300_2144 |                         | Putative uncharacterized protein                                      | 1.155 | 2.53 | 182  | 21.12552 | 469.59  | 9  |
| SAUSA300_2367 | <i>hlgB</i>             | Gamma-hemolysin component B                                           | 1.085 | 2.01 | 325  | 36.67033 | 1500.94 | 20 |
| SAUSA300_0475 | <i>spoV<sub>G</sub></i> | Putative septation protein                                            | 1.085 | 3.07 | 100  | 11.25261 | 444.34  | 7  |
| SAUSA300_2463 | <i>ddh</i>              | D-lactate dehydrogenase                                               | 1.065 | 2.77 | 351  | 39.18907 | 337.42  | 8  |
| SAUSA300_2058 | <i>atpD</i>             | ATP synthase subunit beta                                             | 1.055 | 2.54 | 470  | 51.35019 | 1410.5  | 19 |
| SAUSA300_2091 | <i>deoD</i>             | Purine nucleoside phosphorylase                                       | 1.045 | 2.35 | 236  | 25.87381 | 505.04  | 8  |

|                 |                         |                                             |       |      |     |          |         |    |
|-----------------|-------------------------|---------------------------------------------|-------|------|-----|----------|---------|----|
| SAUSA300_0791   | <i>gcvH</i>             | Glycine cleavage system H protein           | 1.045 | 2.66 | 126 | 14.06582 | 396.9   | 7  |
| SAUSA300_0224   | <i>coa</i>              | Staphylocoagulase                           | 1.035 | 2.04 | 609 | 68.72057 | 1727.54 | 31 |
| SAUSA300_0594   | <i>adh</i>              | Alcohol dehydrogenase                       | 1.035 | 2.71 | 336 | 36.00667 | 1414.74 | 18 |
| SAUSA300_1044   | <i>trxA</i>             | Thioredoxin                                 | 1.025 | 2.13 | 104 | 11.41479 | 497.29  | 8  |
| SAUSA300_2130   |                         | Probable uridylyltransferase                | 1.025 | 2.21 | 395 | 44.84763 | 100.07  | 3  |
| SAUSA300_1674   |                         | Putative serine protease HtrA               | 1.005 | 1.8  | 292 | 32.13835 | 871.6   | 12 |
| SAUSA300_0536   | <i>hchA</i>             | Chaperone protein                           | 1.005 | 2.57 | 424 | 45.75719 | 258.74  | 6  |
| SAUSA300_0424.3 | <i>psmA</i><br><i>2</i> | Phenol-soluble modulins alpha 2 peptide     | 0.985 | 1.79 | 21  | 2.258359 | 333.57  | 4  |
| SAUSA300_1922   | <i>sak</i>              | Staphylokinase                              | 0.975 | 0.89 | 163 | 18.4447  | 218.76  | 5  |
| SAUSA300_1517   | <i>nfo</i>              | Probable endonuclease 4                     | 0.975 | 1.52 | 296 | 33.11978 | 92.14   | 2  |
| SAUSA300_1038   | <i>pheT</i>             | Phenylalanyl-tRNA synthetase beta chain     | 0.965 | 2.3  | 800 | 88.90557 | 332.36  | 6  |
| SAUSA300_1624   |                         | MutT/nudix family protein                   | 0.965 | 2.83 | 202 | 22.91426 | 262.86  | 5  |
| SAUSA300_1068   |                         | Antibacterial protein                       | 0.955 | 1.9  | 44  | 4.435358 | 382.88  | 3  |
| SAUSA300_0235   | <i>ldh1</i>             | L-lactate dehydrogenase 1                   | 0.935 | 2.62 | 317 | 34.54396 | 920.32  | 14 |
| SAUSA300_1654   |                         | Uncharacterized peptidase                   | 0.925 | 2.23 | 351 | 39.51106 | 136.98  | 4  |
| SAUSA300_2089   | <i>pdp</i>              | Pyrimidine-nucleoside phosphorylase         | 0.895 | 3.57 | 433 | 46.26104 | 238.15  | 3  |
| SAUSA300_1167   | <i>pnp</i>              | Polyribonucleotide nucleotidyltransferase   | 0.875 | 2.25 | 698 | 77.29592 | 473.48  | 11 |
| SAUSA300_2171   | <i>rpsL</i>             | 30S ribosomal protein S9                    | 0.865 | 2.56 | 132 | 14.80293 | 394.1   | 9  |
| SAUSA300_0315   | <i>nanA</i>             | N-acetylneuraminidase                       | 0.855 | 1.81 | 317 | 34.63501 | 594.11  | 10 |
| SAUSA300_2254   |                         | Putative 2-hydroxyacid dehydrogenase        | 0.855 | 2.21 | 170 | 19.22673 | 275.84  | 6  |
| SAUSA300_0173   |                         | Putative uncharacterized protein            | 0.855 | 2.87 | 293 | 33.00409 | 144.81  | 4  |
| SAUSA300_1985   | <i>sdrH</i>             | Serine-aspartate repeat family protein      | 0.825 | 1.49 | 417 | 46.35752 | 110.74  | 3  |
| SAUSA300_1168   |                         | Ribonuclease J 2                            | 0.815 | 1.73 | 557 | 62.54552 | 339.22  | 7  |
| SAUSA300_2526   | <i>pyrD</i>             | Dihydroorotate dehydrogenase                | 0.815 | 4.01 | 354 | 39.49352 | 101.31  | 3  |
| SAUSA300_0862   | <i>glpQ</i>             | Glycerophosphoryl diester phosphodiesterase | 0.805 | 1.45 | 309 | 35.27086 | 1437.2  | 23 |
| SAUSA300_0190   | <i>ipdC</i>             | Indole-3-pyruvate decarboxylase             | 0.805 | 1.58 | 133 | 15.17511 | 389.89  | 10 |
| SAUSA300_1053   | <i>flr</i>              | FPRL1 inhibitory protein                    | 0.805 | 1.61 | 546 | 60.48271 | 207.16  | 4  |
| SAUSA300_0664   |                         | Putative uncharacterized protein            | 0.775 | 2.32 | 99  | 11.29879 | 217.8   | 5  |
| SAUSA300_1974   |                         | Uncharacterized leukocidin-like protein 1   | 0.765 | 1.99 | 338 | 38.64416 | 2148.37 | 29 |



|               |             |                                                              |       |      |     |          |             |    |
|---------------|-------------|--------------------------------------------------------------|-------|------|-----|----------|-------------|----|
| SAUSA300_1239 | <i>tkt</i>  | Transketolase                                                | 0.765 | 2.64 | 625 | 68.2991  | 2012.0<br>2 | 32 |
| SAUSA300_1950 |             | Conserved hypothetical phage protein                         | 0.735 | 1.43 | 343 | 37.81305 | 304.49      | 7  |
| SAUSA300_1261 |             | Putative glutamyl aminopeptidase                             | 0.735 | 1.75 | 80  | 9.334598 | 64.46       | 2  |
| SAUSA300_0370 |             | Putative staphylococcal enterotoxin                          | 0.725 | 1.72 | 203 | 23.13325 | 596.79      | 14 |
| SAUSA300_1627 | <i>infC</i> | Translation initiation factor IF-3                           | 0.725 | 3.36 | 175 | 20.18287 | 206.06      | 4  |
| SAUSA300_1575 | <i>alaS</i> | Alanyl-tRNA synthetase                                       | 0.715 | 2.65 | 876 | 98.44059 | 244.7       | 6  |
| SAUSA300_2359 |             | Amino acid ABC transporter, amino acid-binding protein       | 0.695 | 2    | 259 | 28.86793 | 730.56      | 15 |
| SAUSA300_0366 | <i>rpsF</i> | 30S ribosomal protein S6                                     | 0.695 | 2.65 | 98  | 11.56991 | 723.31      | 12 |
| SAUSA300_0523 | <i>rplA</i> | 50S ribosomal protein L1                                     | 0.685 | 2.84 | 230 | 24.67488 | 531.4       | 10 |
| SAUSA300_0964 |             | Chitinase-related protein                                    | 0.675 | 2.73 | 105 | 11.31991 | 319.55      | 6  |
| SAUSA300_2364 | <i>sbi</i>  | Immunoglobulin-binding protein                               | 0.665 | 2.31 | 436 | 50.02192 | 1032.1<br>9 | 21 |
| SAUSA300_1975 |             | Uncharacterized leukocidin-like protein 2                    | 0.655 | 2.25 | 351 | 40.39163 | 1756.4<br>6 | 27 |
| SAUSA300_1448 |             | Transcriptional regulator, Fur family                        | 0.645 | 2.08 | 485 | 54.61757 | 477.27      | 8  |
| SAUSA300_0835 | <i>dltA</i> | D-alanine--poly(phosphoribitol) ligase subunit 1             | 0.645 | 2.76 | 149 | 17.21484 | 150.2       | 3  |
| SAUSA300_0191 | <i>ptsG</i> | PTS system glucose-specific EIICBA component                 | 0.635 | 1.77 | 681 | 73.85965 | 255.89      | 4  |
| SAUSA300_2111 | <i>glmM</i> | Phosphoglucosamine mutase                                    | 0.625 | 1.68 | 451 | 49.21645 | 323.09      | 7  |
| SAUSA300_1124 | <i>fabG</i> | 3-oxoacyl-(Acyl-carrier-protein) reductase                   | 0.615 | 1.61 | 428 | 48.59142 | 834.46      | 17 |
| SAUSA300_0009 | <i>serS</i> | Seryl-tRNA synthetase                                        | 0.615 | 2.67 | 244 | 25.85231 | 537.8       | 12 |
| SAUSA300_0703 | <i>ltaS</i> | Glycerol phosphate lipoteichoic acid synthase                | 0.605 | 2.45 | 646 | 74.33499 | 2090.0<br>2 | 38 |
| SAUSA300_2235 |             | Iron compound ABC transporter, iron compound-binding protein | 0.585 | 1.61 | 302 | 33.97192 | 345.92      | 6  |
| SAUSA300_2506 | <i>isaA</i> | Probable transglycosylase                                    | 0.575 | 1.53 | 97  | 11.01143 | 547.36      | 8  |
| SAUSA300_0278 |             | Putative uncharacterized protein                             | 0.575 | 3.3  | 233 | 24.17044 | 300.35      | 4  |
| SAUSA300_0845 | <i>ampA</i> | Cytosol aminopeptidase                                       | 0.565 | 1.46 | 102 | 11.27682 | 432.92      | 7  |
| SAUSA300_0409 |             | Putative uncharacterized protein                             | 0.565 | 2.17 | 430 | 49.10869 | 314.77      | 6  |
| SAUSA300_1345 | <i>asnS</i> | Asparaginyl-tRNA synthetase                                  | 0.565 | 2.59 | 869 | 94.86656 | 255.38      | 6  |
| SAUSA300_0819 | <i>sufD</i> | FeS assembly protein                                         | 0.565 | 2.9  | 435 | 48.50064 | 167.71      | 4  |
| SAUSA300_0151 | <i>adhE</i> | Alcohol dehydrogenase, iron-containing                       | 0.565 | 3.09 | 491 | 54.07652 | 141.44      | 4  |
| SAUSA300_0539 | <i>ilvE</i> | Branched-chain-amino-acid aminotransferase                   | 0.555 | 1.96 | 701 | 77.78668 | 2318.9<br>9 | 39 |
| SAUSA300_2486 | <i>clpL</i> | ATP-dependent Clp protease ATP-binding subunit               | 0.555 | 2.44 | 358 | 40.04352 | 551.59      | 11 |

|                 |                          |                                                                  |       |      |      |          |             |    |
|-----------------|--------------------------|------------------------------------------------------------------|-------|------|------|----------|-------------|----|
| SAUSA300_1337   | <i>gpsB</i>              | Cell cycle protein                                               | 0.545 | 2.78 | 114  | 13.12465 | 783.43      | 13 |
| SAUSA300_0769   |                          | Putative lipoprotein                                             | 0.535 | 0.33 | 372  | 40.062   | 224.58      | 5  |
| SAUSA300_1655   | <i>ald2</i>              | Alanine dehydrogenase 2                                          | 0.535 | 0.99 | 242  | 28.3834  | 98.35       | 3  |
| SAUSA300_0381   | <i>nfrA</i>              | NADPH-dependent oxidoreductase                                   | 0.525 | 2.17 | 251  | 28.56119 | 66.1        | 2  |
| SAUSA300_0798   |                          | ABC transporter, substrate-binding protein                       | 0.505 | 1.83 | 273  | 30.31416 | 580.01      | 11 |
| SAUSA300_1645   | <i>pfkA</i>              | 6-phosphofructokinase                                            | 0.505 | 2.28 | 307  | 33.35818 | 351.98      | 8  |
| SAUSA300_0424.2 | <i>psmA</i> <sub>3</sub> | Phenol-soluble modulins alpha 3 peptide                          | 0.495 | 2.12 | 22   | 2.587403 | 130.98      | 2  |
| SAUSA300_0220   | <i>pflB</i>              | Formate acetyltransferase                                        | 0.485 | 1.75 | 228  | 25.08599 | 1199.6<br>1 | 19 |
| SAUSA300_0776   | <i>nuc</i>               | Thermonuclease                                                   | 0.485 | 2.19 | 749  | 84.78984 | 996.16      | 18 |
| SAUSA300_0996   | <i>lpdA</i>              | Dihydrolipoyl dehydrogenase                                      | 0.465 | 1.97 | 468  | 49.3885  | 1681.0<br>9 | 27 |
| SAUSA300_2067   | <i>glyA</i>              | Serine hydroxymethyltransferase                                  | 0.465 | 2.54 | 412  | 45.05408 | 668.36      | 14 |
| SAUSA300_2060   | <i>atpA</i>              | ATP synthase subunit alpha                                       | 0.455 | 2.08 | 502  | 54.53243 | 852.42      | 12 |
| SAUSA300_2537   | <i>ldh2</i>              | L-lactate dehydrogenase 2                                        | 0.455 | 3.03 | 319  | 34.38065 | 554.12      | 8  |
| SAUSA300_1507   | <i>glk</i>               | Glucokinase                                                      | 0.445 | 1.54 | 328  | 35.03779 | 148.68      | 3  |
| SAUSA300_2351   |                          | Zn-binding lipoprotein adcA-like protein                         | 0.445 | 1.69 | 516  | 59.13184 | 132.73      | 5  |
| SAUSA300_0569   |                          | UPF0447 protein                                                  | 0.435 | 1.87 | 250  | 29.35344 | 289.5       | 6  |
| SAUSA300_1148   | <i>codY</i>              | GTP-sensing transcriptional pleiotropic repressor                | 0.405 | 2.43 | 257  | 28.71935 | 542.94      | 11 |
| SAUSA300_1290   | <i>dapH</i>              | 2,3,4,5-tetrahydropyridine-2,6-dicarboxylate N-acetyltransferase | 0.405 | 3.54 | 239  | 25.22407 | 174.23      | 4  |
| SAUSA300_0865   | <i>pgi</i>               | Glucose-6-phosphate isomerase                                    | 0.395 | 1.58 | 443  | 49.75898 | 1184.9<br>4 | 19 |
| SAUSA300_2441   | <i>fnbA</i>              | Fibronectin-binding protein A                                    | 0.395 | 1.63 | 1018 | 111.6242 | 630.22      | 10 |
| SAUSA300_2579   |                          | N-acetylmuramoyl-L-alanine amidase domain protein                | 0.385 | 2.4  | 619  | 69.16365 | 2113.6<br>5 | 36 |
| SAUSA300_0717   |                          | Ribonucleoside-diphosphate reductase, beta subunit               | 0.385 | 3.14 | 323  | 37.47139 | 231.58      | 6  |
| SAUSA300_0786   |                          | Organic hydroperoxide resistance protein-like                    | 0.375 | 1.93 | 415  | 46.7873  | 284.16      | 5  |
| SAUSA300_1860   | <i>pepS</i>              | Aminopeptidase                                                   | 0.375 | 2.01 | 140  | 15.31157 | 242.03      | 6  |
| SAUSA300_1172   |                          | Peptidase, M16 family                                            | 0.365 | 0.53 | 602  | 69.75772 | 1333.3<br>1 | 26 |
| SAUSA300_0902   | <i>pepF</i>              | Oligoendopeptidase F                                             | 0.365 | 1.54 | 273  | 30.65983 | 143.02      | 3  |
| SAUSA300_1893   | <i>nadE</i>              | NH(3)-dependent NAD(+) synthetase                                | 0.365 | 2.88 | 428  | 49.86095 | 78          | 3  |
| SAUSA300_1067   |                          | Antibacterial protein                                            | 0.335 | 2.05 | 302  | 31.50422 | 1509.0<br>4 | 18 |

|               |             |                                                               |       |      |      |          |             |    |
|---------------|-------------|---------------------------------------------------------------|-------|------|------|----------|-------------|----|
| SAUSA300_1491 |             | Proline dipeptidase                                           | 0.335 | 2.22 | 353  | 39.29523 | 556.06      | 9  |
| SAUSA300_1139 | <i>sucD</i> | Succinyl-CoA ligase [ADP-forming] subunit alpha               | 0.335 | 2.28 | 44   | 4.475378 | 391.12      | 5  |
| SAUSA300_0555 |             | 3-hexulose-6-phosphate synthase                               | 0.325 | 1.71 | 210  | 22.38571 | 706.97      | 11 |
| SAUSA300_0367 | <i>ssb</i>  | Single-stranded DNA-binding protein                           | 0.315 | 2.48 | 635  | 70.87101 | 576.8       | 15 |
| SAUSA300_2581 |             | Putative surface anchored protein                             | 0.315 | 3.33 | 167  | 18.50991 | 87.55       | 2  |
| SAUSA300_1730 |             | S-adenosylmethionine synthase metK                            | 0.305 | 0.33 | 468  | 51.75207 | 1320.2<br>4 | 21 |
| SAUSA300_0693 |             | Putative lipoprotein                                          | 0.305 | 1.65 | 146  | 16.01717 | 1067.4<br>6 | 19 |
| SAUSA300_1459 | <i>gnd</i>  | 6-phosphogluconate dehydrogenase, decarboxylating             | 0.305 | 2.23 | 397  | 43.59615 | 121.56      | 2  |
| SAUSA300_0307 |             | 5'-nucleotidase, lipoprotein e(P4) family                     | 0.295 | 1.97 | 296  | 33.31334 | 579.26      | 12 |
| SAUSA300_1313 | <i>ctpA</i> | Carboxyl-terminal protease                                    | 0.295 | 2.02 | 1057 | 117.0938 | 532.56      | 11 |
| SAUSA300_1096 | <i>carB</i> | Carbamoyl-phosphate synthase large chain                      | 0.295 | 2.31 | 496  | 55.20915 | 158.87      | 3  |
| SAUSA300_1086 |             | Putative cell-division initiation protein                     | 0.285 | 1.39 | 168  | 18.56445 | 721.51      | 13 |
| SAUSA300_0602 |             | Putative uncharacterized protein                              | 0.285 | 2.08 | 205  | 23.48175 | 318.49      | 5  |
| SAUSA300_1539 | <i>dnaJ</i> | Chaperone protein                                             | 0.285 | 2.67 | 379  | 41.71651 | 119.51      | 3  |
| SAUSA300_2534 | <i>panB</i> | 3-methyl-2-oxobutanoate hydroxymethyltransferase              | 0.275 | 2.71 | 272  | 29.21908 | 331.82      | 5  |
| SAUSA300_2517 |             | Amidohydrolase family protein                                 | 0.265 | 2.51 | 336  | 38.122   | 428.78      | 10 |
| SAUSA300_1683 |             | Chorismate mutase/phospho-2-dehydro-3-deoxyheptonate aldolase | 0.255 | 2.06 | 363  | 40.57505 | 734.94      | 13 |
| SAUSA300_1652 |             | Putative uncharacterized protein                              | 0.245 | 2.06 | 137  | 15.19844 | 637.53      | 11 |
| SAUSA300_1184 |             | Putative uncharacterized protein                              | 0.245 | 2.93 | 97   | 11.00956 | 101.1       | 2  |
| SAUSA300_1983 | <i>groS</i> | 10 kDa chaperonin                                             | 0.235 | 1.19 | 94   | 10.3915  | 269.31      | 6  |
| SAUSA300_2259 |             | Putative transcriptional regulator                            | 0.225 | 1.52 | 307  | 33.76548 | 385.03      | 7  |
| SAUSA300_0690 | <i>saeS</i> | Histidine protein kinase                                      | 0.195 | 0.28 | 336  | 36.24035 | 1927.5<br>7 | 23 |
| SAUSA300_2362 | <i>gpmA</i> | 2,3-bisphosphoglycerate-dependent phosphoglycerate mutase     | 0.195 | 1.83 | 434  | 47.06978 | 1916.6<br>1 | 26 |
| SAUSA300_1103 | <i>rpoZ</i> | DNA-directed RNA polymerase subunit omega                     | 0.195 | 2.02 | 228  | 26.64548 | 1296.3<br>8 | 18 |
| SAUSA300_0756 | <i>gap</i>  | Glyceraldehyde-3-phosphate dehydrogenase, type I              | 0.195 | 2.18 | 72   | 8.127242 | 342.28      | 6  |
| SAUSA300_0760 | <i>eno</i>  | Enolase                                                       | 0.195 | 2.21 | 351  | 39.69869 | 89.32       | 1  |
| SAUSA300_1884 |             | CamS sex pheromone cAM373                                     | 0.185 | 0.92 | 414  | 45.7142  | 874.26      | 15 |
| SAUSA300_0861 | <i>gudB</i> | NAD-specific glutamate dehydrogenase                          | 0.185 | 2.08 | 273  | 30.38835 | 813.22      | 11 |
| SAUSA300_0743 | <i>hprK</i> | HPr kinase/phosphorylase                                      | 0.185 | 2.09 | 310  | 34.4425  | 422.32      | 8  |

|               |             |                                                              |       |      |     |          |         |    |
|---------------|-------------|--------------------------------------------------------------|-------|------|-----|----------|---------|----|
| SAUSA300_0948 | <i>menB</i> | Napthoate synthase                                           | 0.185 | 2.25 | 399 | 45.33477 | 153.61  | 3  |
| SAUSA300_1256 | <i>msrA</i> | Peptide methionine sulfoxide reductase                       | 0.175 | 0.92 | 296 | 33.01607 | 1950.45 | 28 |
| SAUSA300_0991 | <i>def</i>  | Peptide deformylase                                          | 0.175 | 1.99 | 183 | 20.5286  | 414.79  | 8  |
| SAUSA300_1331 | <i>ald1</i> | Alanine dehydrogenase 1                                      | 0.175 | 2.72 | 372 | 40.19179 | 402.58  | 8  |
| SAUSA300_2540 | <i>fda</i>  | Fructose-bisphosphate aldolase class 1                       | 0.175 | 2.74 | 169 | 19.58047 | 56.48   | 1  |
| SAUSA300_2136 |             | Iron compound ABC transporter, iron compound-binding protein | 0.165 | 2.29 | 327 | 36.5507  | 626.35  | 13 |
| SAUSA300_2645 | <i>mnmG</i> | tRNA uridine 5-carboxymethylaminomethyl modification enzyme  | 0.155 | 0.71 | 901 | 98.88978 | 1710.92 | 29 |
| SAUSA300_0989 |             | Ribonuclease J 1                                             | 0.155 | 2.13 | 565 | 62.61195 | 599.15  | 11 |
| SAUSA300_1246 | <i>acnA</i> | Aconitate hydratase                                          | 0.155 | 2.29 | 625 | 70.05405 | 299.47  | 6  |
| SAUSA300_1295 | <i>cspA</i> | Cold shock protein                                           | 0.145 | 2.21 | 66  | 7.298573 | 231.46  | 5  |
| SAUSA300_1193 | <i>glpD</i> | Aerobic glycerol-3-phosphate dehydrogenase                   | 0.135 | 0.88 | 166 | 17.71361 | 564.07  | 9  |
| SAUSA300_2187 | <i>rpsE</i> | 30S ribosomal protein S5                                     | 0.135 | 1.45 | 73  | 8.55364  | 318.58  | 5  |
| SAUSA300_2196 | <i>rpmC</i> | 50S ribosomal protein L29                                    | 0.135 | 1.86 | 102 | 11.92344 | 136.88  | 3  |
| SAUSA300_1572 |             | UPF0473 protein                                              | 0.135 | 3.71 | 557 | 62.33092 | 79.35   | 2  |
| SAUSA300_1362 | <i>hup</i>  | DNA-binding protein HU                                       | 0.125 | 2    | 215 | 23.94125 | 1435.22 | 19 |
| SAUSA300_1804 |             | Putative uncharacterized protein                             | 0.125 | 2.04 | 90  | 9.602159 | 706.4   | 9  |
| SAUSA300_0530 | <i>rpsL</i> | 30S ribosomal protein S12                                    | 0.125 | 2.21 | 199 | 22.31158 | 582.94  | 11 |
| SAUSA300_2183 | <i>adk</i>  | Adenylate kinase                                             | 0.125 | 2.65 | 137 | 15.2594  | 110.28  | 3  |
| SAUSA300_0816 |             | UPF0337 protein                                              | 0.105 | 2.42 | 64  | 6.996469 | 545.01  | 11 |
| SAUSA300_2096 | <i>manA</i> | Mannose-6-phosphate isomerase                                | 0.095 | 0.36 | 318 | 35.5726  | 620.84  | 11 |
| SAUSA300_1920 | <i>chp</i>  | Chemotaxis inhibitory protein                                | 0.095 | 1    | 932 | 105.2592 | 561.71  | 13 |
| SAUSA300_1306 | <i>odhA</i> | 2-oxoglutarate dehydrogenase E1 component                    | 0.095 | 2.43 | 149 | 17.02886 | 133.4   | 3  |
| SAUSA300_0383 |             | Putative uncharacterized protein                             | 0.095 | 2.57 | 312 | 35.60249 | 48.95   | 1  |
| SAUSA300_0857 |             | Putative peptidyl-prolyl cis-trans isomerase                 | 0.085 | 2.19 | 276 | 30.99355 | 840.5   | 11 |
| SAUSA300_2518 |             | Uncharacterized hydrolase                                    | 0.085 | 2.45 | 197 | 21.58746 | 664.65  | 12 |
| SAUSA300_2484 |             | Hydroxymethylglutaryl-CoA synthase                           | 0.065 | 1.68 | 293 | 32.45565 | 2294.36 | 32 |
| SAUSA300_1150 | <i>tsf</i>  | Elongation factor Ts                                         | 0.065 | 2.4  | 388 | 43.16046 | 753.71  | 11 |
| SAUSA300_2192 | <i>rplE</i> | 50S ribosomal protein L5                                     | 0.045 | 1.45 | 179 | 20.23572 | 474.29  | 11 |
| SAUSA300_0993 | <i>pdhA</i> | Pyruvate dehydrogenase E1 component, alpha subunit           | 0.035 | 2.55 | 310 | 32.93712 | 1238.17 | 13 |

|                 |                  |                                                            |        |      |     |          |             |    |
|-----------------|------------------|------------------------------------------------------------|--------|------|-----|----------|-------------|----|
| SAUSA300_0491   | <i>cysK</i>      | Cysteine synthase                                          | 0.035  | 2.73 | 370 | 41.33883 | 1043.0<br>7 | 16 |
| SAUSA300_1163   | <i>rbfA</i>      | Ribosome-binding factor A                                  | 0.025  | 0.75 | 475 | 51.91862 | 553.6       | 9  |
| SAUSA300_0651   |                  | CHAP domain family                                         | 0.025  | 1.98 | 265 | 28.15142 | 403.07      | 5  |
| SAUSA300_2076   |                  | Putative aldehyde dehydrogenase                            | 0.025  | 2.13 | 116 | 13.48797 | 171.51      | 3  |
| SAUSA300_0355   |                  | Probable acetyl-CoA acyltransferase                        | 0.015  | 1.27 | 393 | 41.65943 | 428.37      | 8  |
| SAUSA300_0015   | <i>rplI</i>      | 50S ribosomal protein L9                                   | 0.015  | 1.28 | 148 | 16.42589 | 243         | 4  |
| SAUSA300_1093   | <i>pyrB</i>      | Aspartate carbamoyltransferase                             | 0.005  | 2.42 | 164 | 17.97609 | 769.12      | 11 |
| SAUSA300_1659   | <i>tpx</i>       | Thiol peroxidase                                           | 0.005  | 2.64 | 390 | 40.99363 | 417.97      | 8  |
| SAUSA300_1685   |                  | UPF0478 protein                                            | 0.005  | 2.87 | 163 | 17.97335 | 402.06      | 9  |
| SAUSA300_1080   | <i>ftsZ</i>      | Cell division protein                                      | 0.005  | 3.64 | 293 | 33.21866 | 155.94      | 3  |
| SAUSA300_1889   | <i>purB</i>      | Adenylosuccinate lyase                                     | -0.005 | 1.45 | 253 | 27.22674 | 1597.8<br>1 | 26 |
| SAUSA300_0886   | <i>fabF</i>      | 3-oxoacyl-(Acyl-carrier-protein) synthase II               | -0.005 | 1.73 | 414 | 43.72083 | 752.93      | 11 |
| SAUSA300_0424.4 | <i>psmA</i><br>1 | Phenol-soluble modulins alpha 1 peptide                    | -0.005 | 1.8  | 21  | 2.240333 | 440.05      | 6  |
| SAUSA300_0758   | <i>tpiA</i>      | Triosephosphate isomerase                                  | -0.005 | 2.18 | 431 | 49.55427 | 425.55      | 8  |
| SAUSA300_1678   | <i>fhs</i>       | Formate--tetrahydrofolate ligase                           | -0.015 | 2.06 | 555 | 59.82815 | 1356.4<br>5 | 23 |
| SAUSA300_1784   | <i>traP</i>      | Signal transduction protein                                | -0.025 | 0.89 | 805 | 91.71015 | 659.54      | 11 |
| SAUSA300_1704   | <i>leuS</i>      | Leucyl-tRNA synthetase                                     | -0.025 | 2.46 | 167 | 19.5175  | 160.84      | 4  |
| SAUSA300_1725   |                  | Transaldolase                                              | -0.035 | 2.41 | 237 | 25.68536 | 1035.4      | 17 |
| SAUSA300_1697   |                  | Putative dipeptidase                                       | -0.045 | 1.66 | 585 | 63.04507 | 2675.3<br>4 | 35 |
| SAUSA300_0453   |                  | UPF0133 protein                                            | -0.045 | 1.8  | 469 | 52.77272 | 1230.3<br>6 | 18 |
| SAUSA300_2066   | <i>upp</i>       | Uracil phosphoribosyltransferase                           | -0.045 | 1.89 | 209 | 23.01721 | 767.91      | 12 |
| SAUSA300_1644   | <i>pyk</i>       | Pyruvate kinase                                            | -0.045 | 2.27 | 166 | 17.6812  | 511.27      | 8  |
| SAUSA300_0524   | <i>rplJ</i>      | 50S ribosomal protein L10                                  | -0.045 | 2.83 | 105 | 11.57171 | 492.86      | 6  |
| SAUSA300_1055   | <i>efb</i>       | Fibrinogen-binding protein                                 | -0.055 | 1.84 | 165 | 18.73502 | 652.09      | 11 |
| SAUSA300_0388   | <i>guaB</i>      | Inosine-5'-monophosphate dehydrogenase                     | -0.065 | 2.16 | 488 | 52.79953 | 2463.1<br>6 | 35 |
| SAUSA300_1496   | <i>gcvP</i><br>B | Probable glycine dehydrogenase [decarboxylating] subunit 2 | -0.065 | 2.71 | 490 | 54.72975 | 391.57      | 6  |
| SAUSA300_1902   |                  | Uncharacterized protein                                    | -0.075 | 0.96 | 199 | 22.67932 | 514.54      | 9  |
| SAUSA300_1513   | <i>sodA</i>      | Superoxide dismutase [Mn/Fe] 1                             | -0.075 | 1.77 | 140 | 15.91698 | 488.59      | 9  |

|               |             |                                                             |        |      |     |          |             |    |
|---------------|-------------|-------------------------------------------------------------|--------|------|-----|----------|-------------|----|
| SAUSA300_1330 | <i>tdcB</i> | Threonine dehydratase catabolic                             | -0.075 | 1.94 | 346 | 37.26447 | 242.31      | 5  |
| SAUSA300_1787 |             | HIT family protein                                          | -0.075 | 2.29 | 342 | 38.50491 | 149.46      | 3  |
| SAUSA300_1227 | <i>thrC</i> | Threonine synthase                                          | -0.085 | 1.36 | 166 | 18.44549 | 694.86      | 9  |
| SAUSA300_1656 |             | Putative universal stress protein                           | -0.085 | 2.44 | 353 | 37.82783 | 389.24      | 7  |
| SAUSA300_1720 |             | Putative uncharacterized protein                            | -0.095 | 0.77 | 284 | 32.46767 | 94.51       | 4  |
| SAUSA300_1123 | <i>fabD</i> | Malonyl CoA-acyl carrier protein transacylase               | -0.105 | 1.96 | 300 | 33.07485 | 789.22      | 14 |
| SAUSA300_0871 |             | Uncharacterized protein                                     | -0.105 | 2.25 | 308 | 33.59609 | 584.84      | 7  |
| SAUSA300_0372 |             | Putative lipoprotein                                        | -0.125 | 1.94 | 657 | 74.83617 | 1155.4<br>2 | 21 |
| SAUSA300_0467 | <i>metS</i> | Methionyl-tRNA synthetase                                   | -0.125 | 2.24 | 190 | 21.27478 | 991.83      | 20 |
| SAUSA300_1454 | <i>zwf</i>  | Glucose-6-phosphate 1-dehydrogenase                         | -0.125 | 2.87 | 494 | 56.91143 | 377.82      | 9  |
| SAUSA300_0618 |             | ABC transporter, substrate-binding protein                  | -0.135 | 1.71 | 309 | 34.70097 | 1658.9<br>3 | 24 |
| SAUSA300_0966 | <i>purE</i> | Phosphoribosylaminoimidazole carboxylase, catalytic subunit | -0.135 | 2.8  | 139 | 14.71478 | 428.37      | 5  |
| SAUSA300_0790 |             | Putative arsenate reductase                                 | -0.145 | 0.77 | 466 | 53.63384 | 491.38      | 11 |
| SAUSA300_0515 | <i>cysS</i> | CysteinyI-tRNA synthetase                                   | -0.145 | 1.76 | 118 | 13.573   | 120.62      | 3  |
| SAUSA300_0389 | <i>guaA</i> | GMP synthase [glutamine-hydrolyzing]                        | -0.155 | 1.17 | 295 | 31.95418 | 1099.3<br>1 | 14 |
| SAUSA300_0504 | <i>pdxS</i> | Pyridoxal biosynthesis lyase                                | -0.155 | 2.19 | 513 | 58.17566 | 635.88      | 13 |
| SAUSA300_0385 |             | Putative uncharacterized protein                            | -0.165 | 2.02 | 135 | 15.09457 | 359.98      | 5  |
| SAUSA300_0596 | <i>argS</i> | Arginyl-tRNA synthetase                                     | -0.195 | 1.75 | 325 | 35.20614 | 1225.8      | 18 |
| SAUSA300_0994 | <i>pdhB</i> | Pyruvate dehydrogenase E1 component, beta subunit           | -0.195 | 2.05 | 258 | 27.18078 | 708.26      | 9  |
| SAUSA300_0129 |             | Acetoin(Diacetyl) reductase                                 | -0.195 | 2.06 | 553 | 62.32445 | 698.66      | 13 |
| SAUSA300_0468 |             | Hydrolase, TatD family                                      | -0.205 | 0.77 | 199 | 23.00834 | 393.42      | 6  |
| SAUSA300_0135 | <i>sodM</i> | Superoxide dismutase [Mn/Fe] 2                              | -0.205 | 1.12 | 257 | 29.24489 | 135.91      | 3  |
| SAUSA300_0759 | <i>gpmI</i> | 2,3-bisphosphoglycerate-independent phosphoglycerate mutase | -0.215 | 1.98 | 505 | 56.37108 | 1067.9<br>8 | 21 |
| SAUSA300_1201 | <i>glnA</i> | Glutamine synthetase                                        | -0.225 | 2.05 | 446 | 50.7904  | 1458.8<br>2 | 25 |
| SAUSA300_1149 | <i>rpsB</i> | 30S ribosomal protein S2                                    | -0.225 | 2.28 | 255 | 29.05816 | 690.25      | 11 |
| SAUSA300_0510 | <i>clpC</i> | ATP-dependent Clp protease ATP-binding subunit              | -0.235 | 2.05 | 818 | 90.96347 | 1105.2<br>1 | 22 |
| SAUSA300_1874 | <i>ftnA</i> | Ferritin                                                    | -0.255 | 1.93 | 166 | 19.55827 | 460.45      | 9  |
| SAUSA300_0873 | <i>cdr</i>  | Coenzyme A disulfide reductase                              | -0.265 | 1.78 | 438 | 49.24106 | 296.38      | 6  |

|               |             |                                              |        |      |      |          |         |    |
|---------------|-------------|----------------------------------------------|--------|------|------|----------|---------|----|
| SAUSA300_1098 | <i>pyrE</i> | Orotate phosphoribosyltransferase            | -0.275 | 2.55 | 203  | 22.01052 | 88      | 2  |
| SAUSA300_2147 |             | Alcohol dehydrogenase, zinc-containing       | -0.295 | 1.62 | 342  | 36.97571 | 506.07  | 8  |
| SAUSA300_0973 | <i>purM</i> | Phosphoribosylformylglycinamide cyclo-ligase | -0.295 | 2.11 | 333  | 36.22565 | 249.69  | 5  |
| SAUSA300_0025 |             | 5'-nucleotidase family protein               | -0.305 | 0.98 | 772  | 83.35504 | 209.26  | 6  |
| SAUSA300_0525 | <i>rplL</i> | 50S ribosomal protein L7/L12                 | -0.315 | 1.7  | 320  | 35.59774 | 2008.6  | 35 |
| SAUSA300_1304 |             | Putative uncharacterized protein             | -0.315 | 1.86 | 122  | 12.68574 | 815.68  | 11 |
| SAUSA300_2185 | <i>rplO</i> | 50S ribosomal protein L15                    | -0.315 | 1.98 | 166  | 17.93128 | 646.84  | 9  |
| SAUSA300_1790 | <i>prsA</i> | Foldase protein                              | -0.315 | 2.15 | 146  | 15.56943 | 302.82  | 6  |
| SAUSA300_1315 | <i>crr</i>  | PTS system, glucose-specific IIA component   | -0.315 | 2.97 | 269  | 30.04783 | 233.77  | 5  |
| SAUSA300_0279 |             | Putative membrane protein                    | -0.325 | 2.45 | 1009 | 114.7358 | 304.63  | 6  |
| SAUSA300_1232 | <i>katA</i> | Catalase                                     | -0.345 | 0.99 | 505  | 58.3252  | 1688.85 | 25 |
| SAUSA300_1982 | <i>groL</i> | 60 kDa chaperonin                            | -0.345 | 2.12 | 538  | 57.57658 | 1244.89 | 20 |
| SAUSA300_2328 |             | Putative uncharacterized protein             | -0.355 | 1.37 | 118  | 13.31304 | 255.08  | 7  |
| SAUSA300_1358 | <i>ndk</i>  | Nucleoside diphosphate kinase                | -0.365 | 1.54 | 149  | 16.54637 | 352.1   | 6  |
| SAUSA300_0533 | <i>tuf</i>  | Elongation factor Tu                         | -0.395 | 2.16 | 394  | 43.05859 | 2204.52 | 28 |
| SAUSA300_1125 | <i>acpP</i> | Acyl carrier protein                         | -0.395 | 2.17 | 77   | 8.526157 | 388.71  | 6  |
| SAUSA300_0570 | <i>pta</i>  | Phosphate acetyltransferase                  | -0.405 | 1.7  | 328  | 34.91213 | 1284.48 | 19 |
| SAUSA300_0505 | <i>pdxT</i> | Glutamine amidotransferase subunit           | -0.425 | 0.44 | 146  | 16.97348 | 393.97  | 7  |
| SAUSA300_1070 |             | Acetyltransferase, GNAT family               | -0.425 | 2.17 | 186  | 20.59889 | 43.19   | 1  |
| SAUSA300_0253 | <i>scdA</i> | Cell wall-related protein                    | -0.435 | 0.79 | 430  | 46.33564 | 1810.2  | 25 |
| SAUSA300_0995 |             | Dihydrolipoamide acetyltransferase           | -0.435 | 1.59 | 433  | 48.56131 | 1665.81 | 26 |
| SAUSA300_1648 |             | Putative NADP-dependent malic enzyme         | -0.435 | 2.61 | 409  | 44.18782 | 431.69  | 7  |
| SAUSA300_1622 | <i>tig</i>  | Trigger factor                               | -0.435 | 2.74 | 224  | 25.45094 | 154.12  | 3  |
| SAUSA300_0527 | <i>rpoB</i> | DNA-directed RNA polymerase subunit beta     | -0.445 | 1.76 | 1183 | 133.1182 | 1680.2  | 30 |
| SAUSA300_0736 |             | Uncharacterized protein                      | -0.455 | 1.07 | 190  | 22.18128 | 396.98  | 8  |
| SAUSA300_0672 |             | Transcriptional regulator, MarR family       | -0.455 | 1.79 | 147  | 17.06092 | 368.5   | 7  |
| SAUSA300_1087 | <i>ileS</i> | Isoleucyl-tRNA synthetase                    | -0.465 | 1.04 | 917  | 104.8017 | 1028.07 | 22 |
| SAUSA300_0727 | <i>pepT</i> | Peptidase T                                  | -0.475 | 1.26 | 408  | 45.80091 | 172.33  | 4  |

|               |             |                                                          |        |      |     |          |         |    |
|---------------|-------------|----------------------------------------------------------|--------|------|-----|----------|---------|----|
| SAUSA300_0885 | <i>fabH</i> | 3-oxoacyl-[acyl-carrier-protein] synthase 3              | -0.485 | 0.97 | 876 | 101.6421 | 854.11  | 17 |
| SAUSA300_1611 | <i>valS</i> | Valyl-tRNA synthetase                                    | -0.485 | 2.11 | 122 | 13.72144 | 386.93  | 8  |
| SAUSA300_2177 | <i>rplQ</i> | 50S ribosomal protein L17                                | -0.485 | 2.21 | 313 | 33.83991 | 191.26  | 3  |
| SAUSA300_2230 | <i>modA</i> | Molybdenum ABC transporter, molybdenum-binding protein   | -0.495 | 0.92 | 260 | 29.01527 | 141.49  | 4  |
| SAUSA300_0552 |             | Putative uncharacterized protein                         | -0.505 | 0.77 | 221 | 24.88752 | 162.41  | 4  |
| SAUSA300_0912 |             | Trans-2-enoyl-ACP reductase                              | -0.515 | 0.44 | 424 | 46.32447 | 595.97  | 12 |
| SAUSA300_1094 | <i>pyrC</i> | Dihydroorotase                                           | -0.515 | 1.54 | 256 | 27.95657 | 124.58  | 2  |
| SAUSA300_2462 |             | Putative NAD(P)H nitroreductase                          | -0.525 | 0.4  | 223 | 25.35464 | 147.62  | 3  |
| SAUSA300_1587 | <i>hisS</i> | Histidyl-tRNA synthetase                                 | -0.525 | 0.47 | 420 | 48.23432 | 45.62   | 1  |
| SAUSA300_0141 | <i>deoB</i> | Phosphopentomutase                                       | -0.535 | 0.84 | 392 | 43.75008 | 574.62  | 12 |
| SAUSA300_0897 | <i>trpS</i> | Tryptophanyl-tRNA synthetase                             | -0.535 | 1.36 | 329 | 36.86807 | 447.29  | 7  |
| SAUSA300_1074 | <i>ftsL</i> | Cell division protein                                    | -0.535 | 1.46 | 185 | 20.5233  | 415.31  | 7  |
| SAUSA300_1490 | <i>efp</i>  | Elongation factor P                                      | -0.535 | 2.54 | 133 | 15.30603 | 84.32   | 1  |
| SAUSA300_0380 | <i>ahpC</i> | Alkyl hydroperoxide reductase subunit C                  | -0.545 | 1.56 | 189 | 20.94548 | 1070.1  | 16 |
| SAUSA300_0789 |             | Putative thioredoxin                                     | -0.545 | 1.68 | 220 | 23.31081 | 412.08  | 7  |
| SAUSA300_2090 | <i>deoC</i> | Deoxyribose-phosphate aldolase                           | -0.545 | 2.4  | 106 | 12.1149  | 311.24  | 5  |
| SAUSA300_0757 | <i>pgk</i>  | Phosphoglycerate kinase                                  | -0.555 | 2.09 | 396 | 42.55743 | 1202.16 | 22 |
| SAUSA300_0535 |             | Putative pyridoxal phosphate-dependent acyltransferase   | -0.555 | 2.16 | 395 | 42.84577 | 455.03  | 9  |
| SAUSA300_0974 | <i>purN</i> | Phosphoribosylglycinamide formyltransferase              | -0.565 | 1.72 | 610 | 66.30297 | 1874.78 | 32 |
| SAUSA300_1540 | <i>dnaK</i> | Chaperone protein                                        | -0.565 | 2.17 | 188 | 21.11984 | 77.96   | 2  |
| SAUSA300_2092 | <i>dps</i>  | General stress protein 20U                               | -0.575 | 1.15 | 60  | 6.700503 | 230.44  | 4  |
| SAUSA300_1582 |             | UPF0337 protein                                          | -0.575 | 2.17 | 147 | 16.66303 | 212.5   | 3  |
| SAUSA300_0968 | <i>purC</i> | Phosphoribosylaminoimidazole-succinocarboxamide synthase | -0.585 | 0.94 | 427 | 47.53128 | 1020.1  | 21 |
| SAUSA300_1166 | <i>rpsO</i> | 30S ribosomal protein S15                                | -0.585 | 1.48 | 234 | 26.65799 | 209.01  | 5  |
| SAUSA300_0017 | <i>purA</i> | Adenylosuccinate synthetase                              | -0.585 | 2.16 | 89  | 10.58378 | 172.81  | 4  |
| SAUSA300_2072 | <i>prfA</i> | Peptide chain release factor 1                           | -0.585 | 3.08 | 358 | 40.30729 | 119.46  | 3  |
| SAUSA300_0975 | <i>purH</i> | Bifunctional purine biosynthesis protein                 | -0.605 | 1.48 | 391 | 43.24311 | 1414.85 | 21 |
| SAUSA300_1365 | <i>rpsA</i> | 30S ribosomal protein S1                                 | -0.605 | 2.03 | 492 | 54.32593 | 276.37  | 6  |
| SAUSA300_2278 | <i>hutU</i> | Urocanate hydratase                                      | -0.615 | 0.61 | 463 | 53.56825 | 1311.29 | 23 |



|               |                   |                                                              |        |      |      |          |         |    |
|---------------|-------------------|--------------------------------------------------------------|--------|------|------|----------|---------|----|
| SAUSA300_2172 | <i>rplM</i>       | 50S ribosomal protein L13                                    | -0.615 | 1.91 | 145  | 16.30536 | 556.85  | 12 |
| SAUSA300_2203 | <i>rplD</i>       | 50S ribosomal protein L4                                     | -0.615 | 2    | 553  | 60.57669 | 497.15  | 10 |
| SAUSA300_1525 | <i>glyQS</i>      | Glycyl-tRNA synthetase                                       | -0.615 | 2.15 | 207  | 22.43296 | 305.51  | 7  |
| SAUSA300_1303 |                   | Putative uncharacterized protein                             | -0.625 | 0.57 | 67   | 7.875974 | 150.76  | 3  |
| SAUSA300_1904 |                   | Putative uncharacterized protein                             | -0.625 | 1.23 | 57   | 6.542483 | 117.28  | 2  |
| SAUSA300_2204 | <i>rplC</i>       | 50S ribosomal protein L3                                     | -0.635 | 1.95 | 220  | 23.68549 | 642.94  | 11 |
| SAUSA300_1731 | <i>pckA</i>       | Phosphoenolpyruvate carboxykinase [ATP]                      | -0.645 | 1.38 | 530  | 59.32209 | 1541.76 | 27 |
| SAUSA300_1011 |                   | Putative uncharacterized protein                             | -0.645 | 1.79 | 448  | 49.66723 | 207.22  | 3  |
| SAUSA300_1497 | <i>gcvP<br/>A</i> | Probable glycine dehydrogenase [decarboxylating] subunit 1   | -0.645 | 1.9  | 160  | 18.55128 | 41.62   | 1  |
| SAUSA300_2199 | <i>rplV</i>       | 50S ribosomal protein L22                                    | -0.655 | 2.04 | 680  | 76.61122 | 3967.87 | 62 |
| SAUSA300_2603 | <i>lip</i>        | Triacylglycerol lipase                                       | -0.655 | 2.1  | 286  | 30.79867 | 1375.96 | 19 |
| SAUSA300_2079 | <i>fba</i>        | Fructose bisphosphate aldolase                               | -0.655 | 2.12 | 117  | 12.80899 | 651.57  | 8  |
| SAUSA300_0605 | <i>sarA</i>       | Transcriptional regulator                                    | -0.655 | 2.32 | 124  | 14.69081 | 295.79  | 7  |
| SAUSA300_1640 | <i>icd</i>        | Isocitrate dehydrogenase [NADP]                              | -0.665 | 1.59 | 422  | 46.37585 | 469.72  | 12 |
| SAUSA300_1514 | <i>fur</i>        | Ferric uptake regulation protein                             | -0.675 | 1.08 | 133  | 14.78492 | 369.79  | 8  |
| SAUSA300_2195 | <i>rpsQ</i>       | 30S ribosomal protein S17                                    | -0.675 | 1.08 | 136  | 15.89382 | 95.28   | 3  |
| SAUSA300_0486 |                   | Polyribonucleotide nucleotidyltransferase                    | -0.675 | 2.26 | 87   | 10.15054 | 77.74   | 3  |
| SAUSA300_0379 | <i>ahpF</i>       | Alkyl hydroperoxide reductase, subunit F                     | -0.685 | 1.33 | 1207 | 135.2864 | 3072.44 | 53 |
| SAUSA300_0528 | <i>rpoC</i>       | DNA-directed RNA polymerase subunit beta'                    | -0.685 | 1.76 | 507  | 54.61085 | 457.12  | 9  |
| SAUSA300_0170 | <i>aldA</i>       | Putative aldehyde dehydrogenase                              | -0.685 | 1.99 | 495  | 53.60756 | 364.96  | 7  |
| SAUSA300_0984 | <i>ptsI</i>       | Phosphoenolpyruvate-protein phosphotransferase               | -0.705 | 1.78 | 572  | 63.16134 | 840.59  | 14 |
| SAUSA300_2491 | <i>rocA</i>       | 1-pyrroline-5-carboxylate dehydrogenase                      | -0.725 | 2.13 | 514  | 56.81366 | 1241.51 | 20 |
| SAUSA300_0117 | <i>sirA</i>       | Iron compound ABC transporter, iron compound-binding protein | -0.735 | 0.89 | 156  | 17.48445 | 464.26  | 7  |
| SAUSA300_2088 | <i>luxS</i>       | S-ribosylhomocysteine lyase                                  | -0.735 | 2.03 | 330  | 36.70343 | 155.75  | 3  |
| SAUSA300_2039 | <i>ddl</i>        | D-alanine--D-alanine ligase                                  | -0.745 | 0.86 | 356  | 40.18735 | 116.1   | 2  |
| SAUSA300_1119 |                   | Uncharacterized protein                                      | -0.755 | 0.01 | 217  | 23.75514 | 204.05  | 4  |
| SAUSA300_0479 | <i>rplY</i>       | 50S ribosomal protein L25                                    | -0.755 | 1.71 | 548  | 60.45937 | 177.18  | 3  |
| SAUSA300_1533 |                   | UPF0365 protein                                              | -0.775 | 1.4  | 329  | 35.14167 | 528.54  | 10 |

|                 |              |                                                        |        |      |     |          |         |    |
|-----------------|--------------|--------------------------------------------------------|--------|------|-----|----------|---------|----|
| SAUSA300_1567   | <i>greA</i>  | Transcription elongation factor                        | -0.775 | 2.02 | 158 | 17.71389 | 478.75  | 7  |
| SAUSA300_2142   | <i>asp23</i> | Alkaline shock protein 23                              | -0.785 | 1.68 | 169 | 19.16167 | 1293.82 | 18 |
| SAUSA300_0477   | <i>glmU</i>  | Bifunctional protein                                   | -0.785 | 2.64 | 450 | 48.48478 | 265.88  | 4  |
| SAUSA300_1240   |              | Putative uncharacterized protein                       | -0.795 | 0.17 | 400 | 43.99669 | 854.21  | 13 |
| SAUSA300_1657   | <i>ackA</i>  | Acetate kinase                                         | -0.795 | 1.94 | 238 | 26.622   | 309.15  | 7  |
| SAUSA300_0249   | <i>ispD</i>  | 2-C-methyl-D-erythritol 4-phosphate cytidyltransferase | -0.795 | 2.1  | 95  | 10.9977  | 132.75  | 4  |
| SAUSA300_2447   |              | Putative uncharacterized protein                       | -0.805 | 0.05 | 162 | 18.98431 | 113.92  | 4  |
| SAUSA300_1152   | <i>frr</i>   | Ribosome-recycling factor                              | -0.815 | 2.15 | 184 | 20.32257 | 572.93  | 11 |
| SAUSA300_1688   |              | Phenylalanyl-tRNA synthetase (Beta subunit)            | -0.825 | 0.92 | 84  | 9.698767 | 336.81  | 6  |
| SAUSA300_0424.1 | <i>psmA4</i> | Phenol-soluble modulins alpha 4 peptide                | -0.825 | 1.87 | 20  | 2.152342 | 226.38  | 3  |
| SAUSA300_2074   | <i>rpmE2</i> | 50S ribosomal protein L31 type B                       | -0.825 | 2.59 | 198 | 21.65801 | 154.63  | 2  |
| SAUSA300_0972   | <i>purF</i>  | Amidophosphoribosyltransferase                         | -0.835 | 1.56 | 494 | 54.34459 | 623.46  | 10 |
| SAUSA300_1675   | <i>tyrS</i>  | Tyrosyl-tRNA synthetase                                | -0.835 | 1.66 | 91  | 10.58059 | 172.8   | 3  |
| SAUSA300_2202   | <i>rplW</i>  | 50S ribosomal protein L23                              | -0.835 | 1.85 | 420 | 47.5501  | 140.51  | 3  |
| SAUSA300_2281   | <i>hutG</i>  | Formimidoylglutamate                                   | -0.855 | 0.29 | 169 | 19.29594 | 804.58  | 13 |
| SAUSA300_2108   | <i>mtlD</i>  | Mannitol-1-phosphate 5-dehydrogenase                   | -0.855 | 1.11 | 368 | 40.9081  | 388.46  | 8  |
| SAUSA300_1521   | <i>rpoD</i>  | RNA polymerase sigma factor                            | -0.855 | 1.85 | 368 | 42.12691 | 280.73  | 7  |
| SAUSA300_0916   |              | UPF0477 protein                                        | -0.855 | 2.07 | 91  | 10.21053 | 270.75  | 6  |
| SAUSA300_1131   | <i>rpsP</i>  | 30S ribosomal protein S16                              | -0.855 | 2.28 | 311 | 34.4734  | 98.29   | 2  |
| SAUSA300_1862   | <i>ptpA</i>  | Low molecular weight protein-tyrosine-phosphatase      | -0.865 | 1.03 | 381 | 42.86179 | 571.56  | 12 |
| SAUSA300_0234   |              | Putative flavohemoprotein                              | -0.865 | 1.08 | 121 | 13.69254 | 318.27  | 8  |
| SAUSA300_2180   | <i>rpsM</i>  | 30S ribosomal protein S13                              | -0.865 | 1.73 | 154 | 17.46145 | 182.45  | 3  |
| SAUSA300_1698   |              | Putative uncharacterized protein                       | -0.875 | 1.66 | 140 | 15.70615 | 400.34  | 8  |
| SAUSA300_1965   |              | Conserved hypothetical phage protein                   | -0.895 | 0.37 | 102 | 11.30811 | 426.97  | 8  |
| SAUSA300_1603   | <i>rplU</i>  | 50S ribosomal protein L21                              | -0.895 | 1.83 | 79  | 9.181788 | 66.95   | 1  |
| SAUSA300_1691   |              | Glutamyl-aminopeptidase                                | -0.905 | 0.5  | 223 | 24.49316 | 428.01  | 5  |
| SAUSA300_1919   | <i>scn</i>   | Staphylococcal complement inhibitor                    | -0.905 | 1.26 | 116 | 13.04093 | 401.95  | 5  |
| SAUSA300_0970   | <i>purQ</i>  | Phosphoribosylformylglycinamide synthase 1             | -0.905 | 1.59 | 140 | 16.4555  | 236.83  | 7  |
| SAUSA300_2418   |              | Putative uncharacterized protein                       | -0.905 | 2.08 | 358 | 39.74019 | 213.74  | 4  |

|                         |             |                                                                 |        |      |     |          |             |    |
|-------------------------|-------------|-----------------------------------------------------------------|--------|------|-----|----------|-------------|----|
| SAUSA300_2104           | <i>glmS</i> | Glucosamine-fructose-6-phosphate aminotransferase (Isomerizing) | -0.925 | 1.12 | 314 | 34.9721  | 654.7       | 10 |
| SAUSA300_2178           | <i>rpoA</i> | DNA-directed RNA polymerase subunit alpha                       | -0.925 | 1.87 | 601 | 65.79093 | 196.57      | 5  |
| SAUSA300_0747           | <i>trxB</i> | Thioredoxin reductase                                           | -0.935 | 0.98 | 311 | 33.57699 | 290.45      | 6  |
| SAUSA300_1869           | <i>map</i>  | Methionine aminopeptidase                                       | -0.935 | 1.32 | 144 | 15.58683 | 198.15      | 5  |
| SAUSA300_2107           | <i>mtlA</i> | PTS system, mannitol specific IIA component                     | -0.935 | 1.87 | 252 | 27.46705 | 132.08      | 2  |
| SAUSA300_2275           |             | Oxidoreductase, short chain dehydrogenase/reductase family      | -0.945 | 1.22 | 690 | 76.35305 | 4559.9<br>3 | 66 |
| SAUSA300_0320           |             | Triacylglycerol lipase                                          | -0.945 | 1.72 | 293 | 31.69669 | 198.89      | 4  |
| SAUSA300_1795           |             | UPF0342 protein                                                 | -0.965 | 2.07 | 114 | 13.28349 | 831.18      | 12 |
| SAUSA300_1625           | <i>rplT</i> | 50S ribosomal protein L20                                       | -0.985 | 1.59 | 498 | 55.94554 | 1377.8<br>7 | 25 |
| SAUSA300_2541           | <i>mgo</i>  | Malate:quinone-oxidoreductase                                   | -0.985 | 1.86 | 118 | 13.65956 | 248.96      | 7  |
| SAUSA300_0965           | <i>folD</i> | Bifunctional protein                                            | -0.995 | 1.53 | 193 | 21.23938 | 954.19      | 17 |
| SAUSA300_pUSA<br>010004 |             | Putative uncharacterized protein                                | -0.995 | 1.89 | 286 | 30.80644 | 787.5       | 13 |
| SAUSA300_0532           | <i>fusA</i> | Elongation factor G                                             | -1.035 | 1.74 | 693 | 76.54595 | 2136.9<br>2 | 29 |
| SAUSA300_2082           | <i>rpoE</i> | Probable DNA-directed RNA polymerase subunit delta              | -1.035 | 1.84 | 176 | 20.85029 | 236.28      | 4  |
| SAUSA300_2253           | <i>ssaA</i> | Secretory antigen                                               | -1.045 | 0.17 | 187 | 21.88402 | 505.32      | 10 |
| SAUSA300_1696           |             | D-alanine aminotransferase dat                                  | -1.045 | 0.49 | 166 | 17.37014 | 252.09      | 2  |
| SAUSA300_1909           |             | Putative uncharacterized protein                                | -1.045 | 1.74 | 282 | 31.85622 | 194.76      | 3  |
| SAUSA300_0931           |             | Putative uncharacterized protein                                | -1.055 | 0.39 | 58  | 6.654429 | 189.38      | 3  |
| SAUSA300_0839           |             | Putative uncharacterized protein                                | -1.055 | 3.16 | 80  | 8.717363 | 70.43       | 2  |
| SAUSA300_2094           |             | Putative uncharacterized protein                                | -1.065 | 0.83 | 87  | 9.897082 | 232.46      | 4  |
| SAUSA300_0969           | <i>purS</i> | Phosphoribosylformylglycinamide synthase                        | -1.065 | 1.61 | 457 | 52.89568 | 83.5        | 2  |
| SAUSA300_2132           |             | UPF0457 protein                                                 | -1.085 | 1.66 | 86  | 9.982143 | 274.74      | 6  |
| SAUSA300_2190           | <i>rpsH</i> | 30S ribosomal protein S8                                        | -1.095 | 1.65 | 132 | 14.80396 | 666.29      | 13 |
| SAUSA300_0002           | <i>dnaN</i> | DNA polymerase III, beta subunit                                | -1.095 | 1.65 | 208 | 23.97587 | 511.62      | 9  |
| SAUSA300_1541           | <i>grpE</i> | Protein grpE                                                    | -1.095 | 1.85 | 108 | 12.17911 | 297.46      | 6  |
| SAUSA300_2024           | <i>rsbV</i> | Anti-sigma factor antagonist                                    | -1.095 | 2.39 | 377 | 41.8697  | 274.77      | 5  |
| SAUSA300_0775           |             | Putative uncharacterized protein                                | -1.105 | 0.2  | 58  | 6.949937 | 97.84       | 2  |
| SAUSA300_1535           | <i>rpsU</i> | 30S ribosomal protein S21                                       | -1.105 | 1.1  | 156 | 17.68793 | 90.18       | 2  |
| SAUSA300_1900           | <i>ppaC</i> | Probable manganese-dependent inorganic pyrophosphatase          | -1.125 | 1.48 | 309 | 34.02932 | 384.33      | 8  |

|               |             |                                                                                                   |        |      |     |          |         |    |
|---------------|-------------|---------------------------------------------------------------------------------------------------|--------|------|-----|----------|---------|----|
| SAUSA300_0513 | <i>gltX</i> | Glutamyl-tRNA synthetase                                                                          | -1.155 | 1.46 | 484 | 56.23538 | 1330.36 | 19 |
| SAUSA300_0522 | <i>rplK</i> | 50S ribosomal protein L11                                                                         | -1.165 | 1.55 | 140 | 14.84687 | 476.02  | 11 |
| SAUSA300_2200 | <i>rpsS</i> | 30S ribosomal protein S19                                                                         | -1.175 | 1.06 | 92  | 10.59056 | 371.14  | 6  |
| SAUSA300_0860 | <i>rocD</i> | Ornithine aminotransferase                                                                        | -1.185 | 1.07 | 396 | 43.37236 | 1281.12 | 22 |
| SAUSA300_2081 | <i>pyrG</i> | CTP synthase                                                                                      | -1.205 | 1.31 | 536 | 59.93665 | 424.45  | 9  |
| SAUSA300_0114 |             | Staphylococcal accessory regulator                                                                | -1.245 | 0.03 | 220 | 23.46987 | 411.12  | 7  |
| SAUSA300_0140 | <i>deoC</i> | Deoxyribose-phosphate aldolase                                                                    | -1.245 | 1.65 | 250 | 29.85286 | 64.38   | 1  |
| SAUSA300_1160 |             | Putative uncharacterized protein                                                                  | -1.255 | 1.06 | 94  | 11.015   | 77.29   | 3  |
| SAUSA300_2258 |             | Putative formate dehydrogenase                                                                    | -1.265 | 0.95 | 388 | 42.01188 | 1357.45 | 21 |
| SAUSA300_1138 | <i>sucC</i> | Succinyl-CoA ligase [ADP-forming] subunit beta                                                    | -1.265 | 1.35 | 984 | 111.1551 | 251.68  | 5  |
| SAUSA300_2277 | <i>hutI</i> | Imidazolonepropionase                                                                             | -1.275 | 1.23 | 412 | 44.99304 | 52.26   | 1  |
| SAUSA300_1880 | <i>gatB</i> | Aspartyl/glutamyl-tRNA(Asn/Gln) amidotransferase subunit B                                        | -1.295 | 1.13 | 475 | 53.60507 | 792.73  | 14 |
| SAUSA300_1162 | <i>infB</i> | Translation initiation factor IF-2                                                                | -1.315 | 0.69 | 705 | 77.80495 | 674.86  | 12 |
| SAUSA300_0844 |             | NADH dehydrogenase-like protein                                                                   | -1.315 | 1.26 | 59  | 6.531681 | 206.85  | 5  |
| SAUSA300_2186 | <i>rpmD</i> | 50S ribosomal protein L30                                                                         | -1.315 | 1.6  | 402 | 44.05863 | 134.43  | 4  |
| SAUSA300_2188 | <i>rplR</i> | 50S ribosomal protein L18                                                                         | -1.335 | 1.67 | 119 | 13.07111 | 404.02  | 8  |
| SAUSA300_2193 | <i>rplX</i> | 50S ribosomal protein L24 rplX                                                                    | -1.345 | 1.64 | 105 | 11.51136 | 166.02  | 3  |
| SAUSA300_1629 | <i>thrS</i> | Threonyl-tRNA synthetase                                                                          | -1.405 | 1.34 | 645 | 74.39533 | 858.83  | 14 |
| SAUSA300_0655 |             | UPF0082 protein                                                                                   | -1.435 | 1.02 | 422 | 46.62648 | 600.46  | 11 |
| SAUSA300_1305 | <i>odhB</i> | Dihydrolipoyllysine-residue succinyltransferase component of 2-oxoglutarate dehydrogenase complex | -1.435 | 1.11 | 238 | 26.28613 | 258.89  | 5  |
| SAUSA300_0752 | <i>clpP</i> | ATP-dependent Clp protease proteolytic subunit                                                    | -1.465 | 1.3  | 195 | 21.48209 | 230.4   | 5  |
| SAUSA300_1047 | <i>sdhA</i> | Succinate dehydrogenase, flavoprotein subunit                                                     | -1.485 | 0.77 | 588 | 65.44367 | 126.63  | 3  |
| SAUSA300_1641 | <i>gltA</i> | Citrate synthase II                                                                               | -1.515 | 1.49 | 373 | 42.54829 | 520.56  | 10 |
| SAUSA300_0992 |             | Putative lipoprotein                                                                              | -1.585 | 1.07 | 208 | 23.84284 | 96.73   | 3  |
| SAUSA300_1159 | <i>nusA</i> | Transcription termination factor                                                                  | -1.605 | 0.76 | 391 | 43.69649 | 189.63  | 5  |
| SAUSA300_0521 | <i>nusG</i> | Transcription antitermination protein                                                             | -1.615 | 0.4  | 182 | 20.63267 | 231.72  | 4  |
| SAUSA300_1320 | <i>thyA</i> | Thymidylate synthase                                                                              | -1.615 | 0.81 | 318 | 36.79824 | 127.81  | 4  |
| SAUSA300_2245 | <i>sarR</i> | HTH-type transcriptional regulator                                                                | -1.635 | 0.65 | 115 | 13.64235 | 106.02  | 2  |
| SAUSA300_1079 | <i>ftsA</i> | Cell division protein                                                                             | -1.645 | 0.92 | 470 | 52.88415 | 414.4   | 9  |

|               |             |                                                            |        |      |     |          |             |    |
|---------------|-------------|------------------------------------------------------------|--------|------|-----|----------|-------------|----|
| SAUSA300_0822 |             | UPF0051 protein                                            | -1.655 | 0.24 | 465 | 52.48007 | 164.84      | 5  |
| SAUSA300_0496 | <i>lysS</i> | Lysyl-tRNA synthetase                                      | -1.685 | 0.74 | 495 | 56.66561 | 447.76      | 8  |
| SAUSA300_0032 | <i>mecA</i> | Penicillin-binding protein 2'                              | -1.715 | 1.37 | 668 | 76.03712 | 1295.1<br>3 | 19 |
| SAUSA300_1894 |             | Nicotinate phosphoribosyltransferase                       | -1.725 | 1.05 | 489 | 55.83918 | 164.46      | 3  |
| SAUSA300_1844 |             | Bacterioferritin comigratory protein                       | -1.755 | 0.8  | 151 | 17.2309  | 94.4        | 2  |
| SAUSA300_1882 | <i>gatC</i> | Aspartyl/glutamyl-tRNA(Asn/Gln) amidotransferase subunit C | -1.765 | 0.53 | 100 | 11.24259 | 380.18      | 6  |
| SAUSA300_1684 |             | Putative uncharacterized protein                           | -1.825 | 0.47 | 399 | 43.88174 | 209.61      | 5  |
| SAUSA300_2021 |             | S1 RNA binding domain protein                              | -1.845 | 1.34 | 716 | 80.86665 | 59.84       | 2  |
| SAUSA300_2577 | <i>manA</i> | Mannose-6-phosphate isomerase, class I                     | -1.875 | 0.36 | 312 | 35.35543 | 119.94      | 3  |
| SAUSA300_2114 | <i>rocF</i> | Arginase                                                   | -1.885 | 0.44 | 302 | 33.22633 | 85.25       | 2  |
| SAUSA300_1856 |             | Putative uncharacterized protein                           | -1.905 | 0.82 | 171 | 18.60243 | 391.49      | 8  |
| SAUSA300_1881 | <i>gatA</i> | Glutamyl-tRNA(Gln) amidotransferase subunit A              | -1.995 | 0.79 | 485 | 52.7698  | 424.46      | 8  |
| SAUSA300_2023 | <i>rsbW</i> | Serine-protein kinase                                      | -2.085 | 0.46 | 159 | 17.89211 | 132.95      | 4  |
| SAUSA300_1215 |             | Putative uncharacterized protein                           | -2.235 | 1.05 | 65  | 7.476927 | 256.65      | 3  |
| SAUSA300_1197 |             | Glutathione peroxidase                                     | -2.325 | 0.74 | 158 | 18.08812 | 103.81      | 3  |
| SAUSA300_0990 |             | UPF0356 protein                                            | -2.335 | 0.18 | 72  | 8.728363 | 64.25       | 1  |
| SAUSA300_1664 | <i>ezaA</i> | Septation ring formation regulator                         | -2.445 | 0.35 | 564 | 66.14066 | 612.55      | 11 |
